# Supplementary material
Source: publisher figshare collection journal article supplement (https://acs.figshare.com/ndownloader/files/4196122)
Supplement: Supplementary file 1 [file 4196122]

_publ_requested_journal       'Inorg. Chem.'
_publ_contact_author_name     'Shatruk, Michael'
_publ_contact_author_address        
;
Department of Chemistry and Biochemistry
Florida State University
95 Chieftan Way
Tallahassee, FL 32306-4390 
USA
;
_publ_contact_author_email           shatruk@chem.fsu.edu
_publ_contact_author_fax             '(850)4178417'
_publ_contact_author_phone           '(850)6448281'
_publ_section_title                  '?' 

loop_
    _publ_author_name
    _publ_author_address
    'Guocan Li'
;
Department of Chemistry and Biochemistry
Florida State University
95 Chieftan Way
Tallahassee, FL 32306-4390 
USA
;
    'Lipika Ray'
;
Department of Chemistry and Biochemistry
Florida State University
95 Chieftan Way
Tallahassee, FL 32306-4390 
USA
;
    'Elliot N. Glass'
;
Department of Chemistry and Biochemistry
Florida State University
95 Chieftan Way
Tallahassee, FL 32306-4390 
USA
;
    'Kirill Kovnir'
;
Department of Chemistry and Biochemistry
Florida State University
95 Chieftan Way
Tallahassee, FL 32306-4390 
USA
;
    'Andrey Khoroshutin'
;
Petroleum Chemistry Division
Department of Chemistry
M. V. Lomonosov Moscow State University
Moscow 199991
Russia
;
    'Serge I. Gorelsky'
;
Centre for Catalysis Research and Innovation
Department of Chemistry
University of Ottawa
Ottawa
Canada
;
    'Michael Shatruk'
;
Department of Chemistry and Biochemistry
Florida State University
95 Chieftan Way
Tallahassee, FL 32306-4390 
USA
;  

_audit_creation_method            manual
_chemical_name_systematic 
; 
 ? 
; 
_chemical_name_common             ? 
_chemical_melting_point           ? 
_chemical_formula_moiety          'C33 H25 N6 Ru S, 2(C H Cl3), F6 P'
_chemical_formula_sum 
 'C35 H27 Cl6 F6 N6 P Ru S' 
_chemical_formula_weight          1022.43 
 
loop_ 
 _atom_type_symbol 
 _atom_type_description 
 _atom_type_scat_dispersion_real 
 _atom_type_scat_dispersion_imag 
 _atom_type_scat_source 
 'C'  'C'   0.0033   0.0016 
 'International Tables Vol C Tables 4.2.6.8 and 6.1.1.4' 
 'H'  'H'   0.0000   0.0000 
 'International Tables Vol C Tables 4.2.6.8 and 6.1.1.4' 
 'N'  'N'   0.0061   0.0033 
 'International Tables Vol C Tables 4.2.6.8 and 6.1.1.4' 
 'F'  'F'   0.0171   0.0103 
 'International Tables Vol C Tables 4.2.6.8 and 6.1.1.4' 
 'P'  'P'   0.1023   0.0942 
 'International Tables Vol C Tables 4.2.6.8 and 6.1.1.4' 
 'S'  'S'   0.1246   0.1234 
 'International Tables Vol C Tables 4.2.6.8 and 6.1.1.4' 
 'Cl'  'Cl'   0.1484   0.1585 
 'International Tables Vol C Tables 4.2.6.8 and 6.1.1.4' 
 'Ru'  'Ru'  -1.2594   0.8363 
 'International Tables Vol C Tables 4.2.6.8 and 6.1.1.4' 
 
_symmetry_cell_setting            triclinic 
_symmetry_space_group_name_H-M    P-1 
 
loop_ 
 _symmetry_equiv_pos_as_xyz 
 'x, y, z' 
 '-x, -y, -z' 
 
_cell_length_a                    11.1262(14) 
_cell_length_b                    12.6553(16) 
_cell_length_c                    15.996(2) 
_cell_angle_alpha                 100.9640(10) 
_cell_angle_beta                  101.3650(10) 
_cell_angle_gamma                 104.7820(10) 
_cell_volume                      2065.2(4) 
_cell_formula_units_Z             2 
_cell_measurement_temperature     153(2) 
_cell_measurement_reflns_used     ? 
_cell_measurement_theta_min       ? 
_cell_measurement_theta_max       ? 
 
_exptl_crystal_description        'plate'
_exptl_crystal_colour             'black' 
_exptl_crystal_size_max           0.68 
_exptl_crystal_size_mid           0.50 
_exptl_crystal_size_min           0.15 
_exptl_crystal_density_meas       ? 
_exptl_crystal_density_diffrn     1.644 
_exptl_crystal_density_method     'not measured' 
_exptl_crystal_F_000              1020 
_exptl_absorpt_coefficient_mu     0.920 
_exptl_absorpt_correction_type    'multi-scan' 
_exptl_absorpt_correction_T_min   0.5736 
_exptl_absorpt_correction_T_max   0.8744 
_exptl_absorpt_process_details    'SADABS v2.03 (Bruker, 2003)' 
 
_exptl_special_details 
; 
 ? 
; 
 
_diffrn_ambient_temperature       153(2) 
_diffrn_radiation_wavelength      0.71073 
_diffrn_radiation_type            MoK\a 
_diffrn_radiation_source          'fine-focus sealed tube' 
_diffrn_radiation_monochromator   graphite 
_diffrn_detector_area_resol_mean  ? 
_diffrn_standards_number          ? 
_diffrn_standards_interval_count  ? 
_diffrn_standards_interval_time   ? 
_diffrn_standards_decay_%         ? 
_diffrn_reflns_number             19502 
_diffrn_reflns_av_R_equivalents   0.0190 
_diffrn_reflns_av_sigmaI/netI     0.0196 
_diffrn_reflns_limit_h_min        -13 
_diffrn_reflns_limit_h_max        13 
_diffrn_reflns_limit_k_min        -15 
_diffrn_reflns_limit_k_max        15 
_diffrn_reflns_limit_l_min        -19 
_diffrn_reflns_limit_l_max        19 
_diffrn_reflns_theta_min          1.96 
_diffrn_reflns_theta_max          25.00 
_reflns_number_total              7244 
_reflns_number_gt                 6870 
_reflns_threshold_expression      >2sigma(I) 
 
_computing_data_collection        'SMART V5.625 (Bruker, 2000)'
_computing_cell_refinement        'SMART V5.625 (Bruker, 2000)'
_computing_data_reduction         'SAINT V6.32 (Bruker, 2001)'
_computing_structure_solution     'SHELXS-97 (Sheldrick, 1990)'
_computing_structure_refinement   'SHELXL-97 (Sheldrick, 1997)'
_computing_molecular_graphics     ?
_computing_publication_material   'SHELXL-97 (Sheldrick, 1997)'
 
_refine_special_details 
; 
 Refinement of F^2^ against ALL reflections.  The weighted R-factor wR and 
 goodness of fit S are based on F^2^, conventional R-factors R are based 
 on F, with F set to zero for negative F^2^. The threshold expression of 
 F^2^ > 2sigma(F^2^) is used only for calculating R-factors(gt) etc. and is 
 not relevant to the choice of reflections for refinement.  R-factors based 
 on F^2^ are statistically about twice as large as those based on F, and R- 
 factors based on ALL data will be even larger. 
; 
 
_refine_ls_structure_factor_coef  Fsqd  
_refine_ls_matrix_type            full 
_refine_ls_weighting_scheme       calc  
_refine_ls_weighting_details 
 'calc w=1/[\s^2^(Fo^2^)+(0.0469P)^2^+3.9942P] where P=(Fo^2^+2Fc^2^)/3' 
_atom_sites_solution_primary      direct 
_atom_sites_solution_secondary    difmap 
_atom_sites_solution_hydrogens    geom 
_refine_ls_hydrogen_treatment     noref 
_refine_ls_extinction_method      none 
_refine_ls_extinction_coef        ? 
_refine_ls_number_reflns          7244 
_refine_ls_number_parameters      612 
_refine_ls_number_restraints      48 
_refine_ls_R_factor_all           0.0440 
_refine_ls_R_factor_gt            0.0420 
_refine_ls_wR_factor_ref          0.1091 
_refine_ls_wR_factor_gt           0.1077 
_refine_ls_goodness_of_fit_ref    1.071 
_refine_ls_restrained_S_all       1.108 
_refine_ls_shift/su_max           0.007 
_refine_ls_shift/su_mean          0.000 
 
loop_ 
 _atom_site_label 
 _atom_site_type_symbol 
 _atom_site_fract_x 
 _atom_site_fract_y 
 _atom_site_fract_z 
 _atom_site_U_iso_or_equiv 
 _atom_site_adp_type 
 _atom_site_occupancy 
 _atom_site_symmetry_multiplicity 
 _atom_site_calc_flag 
 _atom_site_refinement_flags 
 _atom_site_disorder_assembly 
 _atom_site_disorder_group 
Ru1 Ru 0.86519(2) 0.26502(2) 0.172442(16) 0.02841(10) Uani 1 1 d . . . 
C1A C 0.520(2) 0.440(2) -0.1732(17) 0.080(4) Uani 0.543(7) 1 d PD A -2 
H1A H 0.5126 0.4128 -0.2375 0.096 Uiso 0.543(7) 1 calc PR A -2 
Cl1A Cl 0.3737(10) 0.4280(11) -0.1453(8) 0.180(5) Uani 0.543(7) 1 d PD A -2 
Cl2A Cl 0.5593(4) 0.3427(3) -0.10492(18) 0.0752(11) Uani 0.543(7) 1 d PD A -2 
Cl3A Cl 0.6181(5) 0.5691(3) -0.1269(4) 0.1056(17) Uani 0.543(7) 1 d PD A -2 
C1B C 0.500(3) 0.444(3) -0.156(2) 0.080(4) Uani 0.457(7) 1 d P A -1 
H1B H 0.4708 0.3897 -0.2159 0.096 Uiso 0.457(7) 1 calc PR A -1 
Cl2B Cl 0.6465(8) 0.4230(9) -0.1139(3) 0.158(5) Uani 0.457(7) 1 d P A -1 
Cl1B Cl 0.3622(7) 0.4442(8) -0.1363(4) 0.0830(15) Uani 0.457(7) 1 d P A -1 
Cl3B Cl 0.5760(4) 0.5943(6) -0.1879(6) 0.129(3) Uani 0.457(7) 1 d P A -1 
P1 P 0.54154(10) -0.23176(10) -0.57467(6) 0.0468(3) Uani 1 1 d . . . 
F1 F 0.5899(3) -0.1999(3) -0.47189(18) 0.0890(10) Uani 1 1 d . . . 
F2 F 0.5208(3) -0.3604(2) -0.5742(2) 0.0842(9) Uani 1 1 d . . . 
F3 F 0.3974(3) -0.2449(3) -0.5660(2) 0.0753(8) Uani 1 1 d . . . 
F4 F 0.4837(4) -0.2634(4) -0.67741(19) 0.1186(15) Uani 1 1 d . . . 
F5 F 0.6810(3) -0.2218(4) -0.5847(3) 0.1122(14) Uani 1 1 d . . . 
F6 F 0.5631(3) -0.1038(3) -0.5750(3) 0.1052(12) Uani 1 1 d . . . 
N1 N 0.8044(3) 0.1141(2) 0.20226(18) 0.0363(6) Uani 1 1 d . . . 
N2 N 0.7730(3) 0.3081(2) 0.26752(18) 0.0347(6) Uani 1 1 d . . . 
N3 N 1.0341(3) 0.3251(3) 0.27035(19) 0.0368(6) Uani 1 1 d . . . 
N4 N 0.9373(3) 0.4236(3) 0.1563(2) 0.0395(7) Uani 1 1 d . . . 
N5 N 0.9553(3) 0.2104(2) 0.07901(18) 0.0324(6) Uani 1 1 d . . . 
N6 N 0.6958(3) 0.2119(3) 0.07387(19) 0.0377(7) Uani 1 1 d . B . 
C1 C 0.8241(4) 0.0173(3) 0.1658(2) 0.0406(8) Uani 1 1 d . . . 
H1 H 0.8676 0.0166 0.1203 0.049 Uiso 1 1 calc R . . 
C2 C 0.7839(4) -0.0812(3) 0.1912(3) 0.0479(9) Uani 1 1 d . . . 
H2 H 0.8013 -0.1475 0.1646 0.057 Uiso 1 1 calc R . . 
C3 C 0.7183(4) -0.0821(4) 0.2558(3) 0.0564(11) Uani 1 1 d . . . 
H3 H 0.6898 -0.1491 0.2743 0.068 Uiso 1 1 calc R . . 
C4 C 0.6946(4) 0.0156(4) 0.2932(3) 0.0509(10) Uani 1 1 d . . . 
H4 H 0.6491 0.0163 0.3376 0.061 Uiso 1 1 calc R . . 
C5 C 0.7375(4) 0.1134(3) 0.2657(2) 0.0410(8) Uani 1 1 d . . . 
C6 C 0.7196(4) 0.2227(3) 0.3021(2) 0.0417(8) Uani 1 1 d . . . 
C7 C 0.6545(5) 0.2410(4) 0.3660(3) 0.0641(13) Uani 1 1 d . . . 
H7 H 0.6182 0.1810 0.3900 0.077 Uiso 1 1 calc R . . 
C8 C 0.6426(5) 0.3471(4) 0.3948(3) 0.0710(15) Uani 1 1 d . . . 
H8 H 0.5967 0.3601 0.4380 0.085 Uiso 1 1 calc R . . 
C9 C 0.6975(5) 0.4335(4) 0.3607(3) 0.0573(11) Uani 1 1 d . . . 
H9 H 0.6907 0.5070 0.3800 0.069 Uiso 1 1 calc R . . 
C10 C 0.7631(4) 0.4115(3) 0.2976(2) 0.0435(8) Uani 1 1 d . . . 
H10 H 0.8025 0.4715 0.2747 0.052 Uiso 1 1 calc R . . 
C11 C 1.0754(4) 0.2694(4) 0.3280(3) 0.0503(10) Uani 1 1 d . . . 
H11 H 1.0232 0.1955 0.3241 0.060 Uiso 1 1 calc R . . 
C12 C 1.1903(5) 0.3144(5) 0.3926(3) 0.0654(13) Uani 1 1 d . . . 
H12 H 1.2161 0.2723 0.4322 0.078 Uiso 1 1 calc R . . 
C13 C 1.2662(5) 0.4206(5) 0.3984(3) 0.0679(14) Uani 1 1 d . . . 
H13 H 1.3461 0.4529 0.4417 0.081 Uiso 1 1 calc R . . 
C14 C 1.2262(4) 0.4800(4) 0.3414(3) 0.0657(13) Uani 1 1 d . . . 
H14 H 1.2782 0.5539 0.3451 0.079 Uiso 1 1 calc R . . 
C15 C 1.1081(4) 0.4315(3) 0.2772(3) 0.0455(9) Uani 1 1 d . . . 
C16 C 1.0554(4) 0.4859(3) 0.2112(3) 0.0498(10) Uani 1 1 d . . . 
C17 C 1.1189(6) 0.5922(4) 0.2036(4) 0.0798(16) Uani 1 1 d . . . 
H17 H 1.2011 0.6343 0.2421 0.096 Uiso 1 1 calc R . . 
C18 C 1.0621(7) 0.6348(5) 0.1408(4) 0.092(2) Uani 1 1 d . . . 
H18 H 1.1042 0.7076 0.1353 0.110 Uiso 1 1 calc R . . 
C19 C 0.9410(6) 0.5720(4) 0.0835(3) 0.0707(14) Uani 1 1 d . . . 
H19 H 0.8996 0.6011 0.0394 0.085 Uiso 1 1 calc R . . 
C20 C 0.8849(4) 0.4668(3) 0.0937(3) 0.0471(9) Uani 1 1 d . . . 
H20 H 0.8045 0.4224 0.0541 0.057 Uiso 1 1 calc R . . 
C21 C 1.0839(4) 0.2305(3) 0.0914(2) 0.0427(9) Uani 1 1 d . . . 
H21 H 1.1461 0.2681 0.1459 0.051 Uiso 1 1 calc R . . 
C22 C 1.1125(4) 0.1881(4) 0.0124(3) 0.0546(11) Uani 1 1 d . . . 
H22 H 1.1957 0.1919 0.0044 0.066 Uiso 1 1 calc R . . 
C23 C 0.9991(4) 0.1405(4) -0.0503(2) 0.0463(9) Uani 1 1 d . . . 
H23 H 0.9884 0.1051 -0.1104 0.056 Uiso 1 1 calc R . . 
C24 C 0.8994(3) 0.1536(3) -0.0097(2) 0.0325(7) Uani 1 1 d . B . 
C25 C 0.7669(3) 0.1226(3) -0.0513(2) 0.0322(7) Uani 1 1 d . . . 
C26 C 0.6723(3) 0.1473(3) -0.0134(2) 0.0364(7) Uani 1 1 d . B . 
C27 C 0.5372(4) 0.1122(5) -0.0528(3) 0.0598(12) Uani 1 1 d . . . 
H27 H 0.4945 0.0675 -0.1111 0.072 Uiso 1 1 calc R B . 
C28 C 0.4813(4) 0.1543(6) 0.0078(3) 0.0845(19) Uani 1 1 d . B . 
H28 H 0.3919 0.1448 0.0001 0.101 Uiso 1 1 calc R . . 
C29 C 0.5799(4) 0.2148(5) 0.0844(3) 0.0644(14) Uani 1 1 d . . . 
H29 H 0.5662 0.2531 0.1372 0.077 Uiso 1 1 calc R B . 
C30A C 0.7203(11) 0.0553(11) -0.1425(6) 0.030(2) Uani 0.679(6) 1 d PD B -3 
C31A C 0.662(2) 0.0888(16) -0.2160(8) 0.0399(19) Uani 0.679(6) 1 d PD B -3 
H31A H 0.6384 0.1561 -0.2125 0.048 Uiso 0.679(6) 1 calc PR B -3 
C33A C 0.6451(18) 0.0083(15) -0.2949(8) 0.0556(16) Uani 0.679(6) 1 d PD B -3 
H33A H 0.6081 0.0152 -0.3517 0.067 Uiso 0.679(6) 1 calc PR B -3 
S1A S 0.6968(3) -0.1001(2) -0.27807(18) 0.0872(12) Uani 0.679(6) 1 d PD B -3 
C32A C 0.7442(13) -0.0448(12) -0.1679(6) 0.054(2) Uani 0.679(6) 1 d PD B -3 
H32A H 0.7836 -0.0799 -0.1276 0.064 Uiso 0.679(6) 1 calc PR B -3 
C30B C 0.743(3) 0.064(3) -0.1529(14) 0.030(2) Uani 0.321(6) 1 d PD B -4 
C32B C 0.765(3) -0.037(3) -0.1902(14) 0.054(2) Uani 0.321(6) 1 d PD B -4 
H32B H 0.7960 -0.0837 -0.1570 0.064 Uiso 0.321(6) 1 calc PR B -4 
C33B C 0.734(3) -0.062(2) -0.2853(16) 0.0872(12) Uani 0.321(6) 1 d PD B -4 
H33B H 0.7629 -0.1119 -0.3227 0.105 Uiso 0.321(6) 1 calc PR B -4 
S1B S 0.6389(9) 0.0139(8) -0.3179(4) 0.0556(16) Uani 0.321(6) 1 d PD B -4 
C31B C 0.671(5) 0.098(4) -0.2168(17) 0.0399(19) Uani 0.321(6) 1 d PD B -4 
H31B H 0.6424 0.1623 -0.2048 0.048 Uiso 0.321(6) 1 calc PR B -4 
C2A C 1.0886(17) 0.780(3) 0.4002(11) 0.218(12) Uani 0.50 1 d PD C -5 
H2A H 1.1623 0.7808 0.3730 0.261 Uiso 0.50 1 calc PR C -5 
Cl4A Cl 0.9324(10) 0.7333(6) 0.3179(5) 0.164(4) Uani 0.50 1 d PD C -5 
Cl5A Cl 1.0461(8) 0.6576(6) 0.4506(6) 0.160(3) Uani 0.50 1 d PD C -5 
Cl6A Cl 1.1215(15) 0.8932(8) 0.4851(7) 0.217(6) Uani 0.50 1 d PD C -5 
C2B C 0.983(2) 0.838(3) 0.4262(14) 0.218(12) Uani 0.25 1 d PD D -6 
H2B H 0.9048 0.8537 0.4396 0.261 Uiso 0.25 1 calc PR D -6 
Cl4B Cl 0.9797(13) 0.7927(16) 0.3137(6) 0.133(5) Uani 0.25 1 d PD D -6 
Cl5B Cl 1.037(2) 0.728(2) 0.4736(10) 0.213(10) Uani 0.25 1 d PD D -6 
Cl6B Cl 1.116(2) 0.948(2) 0.451(2) 0.38(3) Uani 0.25 1 d PD D -6 
C2C C 1.107(2) 0.817(3) 0.4341(19) 0.218(12) Uani 0.25 1 d PD E -7 
H2C H 1.1932 0.8044 0.4446 0.261 Uiso 0.25 1 calc PR E -7 
Cl6C Cl 1.0652(19) 0.8972(17) 0.5244(8) 0.186(9) Uani 0.25 1 d PD E -7 
Cl4C Cl 1.0640(14) 0.897(2) 0.3496(11) 0.220(10) Uani 0.25 1 d PD E -7 
Cl5C Cl 0.974(2) 0.706(2) 0.413(2) 0.52(4) Uani 0.25 1 d PD E -7 
 
loop_ 
 _atom_site_aniso_label 
 _atom_site_aniso_U_11 
 _atom_site_aniso_U_22 
 _atom_site_aniso_U_33 
 _atom_site_aniso_U_23 
 _atom_site_aniso_U_13 
 _atom_site_aniso_U_12 
Ru1 0.02908(15) 0.03348(16) 0.02595(15) 0.00918(11) 0.00913(10) 0.01239(11) 
C1A 0.074(8) 0.089(4) 0.080(10) -0.010(6) 0.020(6) 0.055(6) 
Cl1A 0.145(6) 0.162(7) 0.278(10) 0.071(6) 0.104(6) 0.072(5) 
Cl2A 0.102(2) 0.0657(18) 0.0624(14) 0.0170(12) 0.0064(14) 0.0448(17) 
Cl3A 0.102(3) 0.0661(17) 0.154(4) 0.033(2) 0.055(3) 0.0140(17) 
C1B 0.074(8) 0.089(4) 0.080(10) -0.010(6) 0.020(6) 0.055(6) 
Cl2B 0.163(7) 0.225(9) 0.091(3) -0.008(4) -0.022(3) 0.142(7) 
Cl1B 0.071(3) 0.110(4) 0.091(3) 0.047(3) 0.026(2) 0.046(3) 
Cl3B 0.064(2) 0.123(4) 0.172(6) -0.010(4) 0.012(3) 0.028(2) 
P1 0.0448(6) 0.0641(7) 0.0324(5) 0.0181(5) 0.0089(4) 0.0150(5) 
F1 0.100(2) 0.114(3) 0.0422(15) 0.0147(16) 0.0036(15) 0.029(2) 
F2 0.0743(19) 0.0620(17) 0.121(3) 0.0193(17) 0.0263(18) 0.0302(15) 
F3 0.0571(16) 0.091(2) 0.094(2) 0.0360(17) 0.0313(15) 0.0317(15) 
F4 0.131(3) 0.196(4) 0.0379(16) 0.017(2) 0.0020(18) 0.089(3) 
F5 0.0647(19) 0.183(4) 0.144(3) 0.110(3) 0.061(2) 0.056(2) 
F6 0.087(2) 0.087(2) 0.150(3) 0.071(2) 0.022(2) 0.0180(19) 
N1 0.0416(16) 0.0383(16) 0.0293(14) 0.0102(12) 0.0095(12) 0.0111(13) 
N2 0.0345(15) 0.0410(16) 0.0282(14) 0.0080(12) 0.0091(12) 0.0105(12) 
N3 0.0357(15) 0.0430(16) 0.0315(15) 0.0038(12) 0.0095(12) 0.0151(13) 
N4 0.0490(18) 0.0404(16) 0.0381(16) 0.0127(13) 0.0213(14) 0.0196(14) 
N5 0.0314(14) 0.0380(15) 0.0327(14) 0.0126(12) 0.0092(12) 0.0157(12) 
N6 0.0330(15) 0.0529(18) 0.0300(15) 0.0087(13) 0.0105(12) 0.0173(13) 
C1 0.046(2) 0.0405(19) 0.0378(19) 0.0132(16) 0.0091(16) 0.0166(16) 
C2 0.055(2) 0.041(2) 0.051(2) 0.0167(18) 0.0134(19) 0.0156(18) 
C3 0.064(3) 0.049(2) 0.055(3) 0.024(2) 0.013(2) 0.008(2) 
C4 0.059(3) 0.053(2) 0.043(2) 0.0176(18) 0.0199(19) 0.010(2) 
C5 0.043(2) 0.047(2) 0.0313(18) 0.0122(15) 0.0113(15) 0.0080(16) 
C6 0.043(2) 0.048(2) 0.0302(18) 0.0077(15) 0.0126(15) 0.0061(16) 
C7 0.083(3) 0.060(3) 0.051(3) 0.010(2) 0.041(2) 0.007(2) 
C8 0.087(4) 0.069(3) 0.056(3) 0.000(2) 0.048(3) 0.010(3) 
C9 0.071(3) 0.050(2) 0.051(2) 0.0003(19) 0.028(2) 0.017(2) 
C10 0.048(2) 0.044(2) 0.042(2) 0.0084(16) 0.0177(17) 0.0167(17) 
C11 0.053(2) 0.060(3) 0.039(2) 0.0111(18) 0.0015(18) 0.027(2) 
C12 0.066(3) 0.083(4) 0.044(2) 0.002(2) -0.005(2) 0.041(3) 
C13 0.050(3) 0.090(4) 0.049(3) -0.005(2) -0.006(2) 0.027(3) 
C14 0.046(2) 0.066(3) 0.063(3) -0.005(2) 0.007(2) 0.001(2) 
C15 0.039(2) 0.050(2) 0.042(2) 0.0018(17) 0.0112(16) 0.0088(17) 
C16 0.051(2) 0.045(2) 0.048(2) 0.0081(18) 0.0190(19) 0.0029(18) 
C17 0.084(4) 0.063(3) 0.075(3) 0.029(3) 0.013(3) -0.011(3) 
C18 0.112(5) 0.061(3) 0.086(4) 0.034(3) 0.021(4) -0.011(3) 
C19 0.111(4) 0.061(3) 0.057(3) 0.036(2) 0.032(3) 0.033(3) 
C20 0.062(2) 0.049(2) 0.042(2) 0.0200(18) 0.0215(19) 0.0225(19) 
C21 0.040(2) 0.061(2) 0.0344(18) 0.0106(17) 0.0106(15) 0.0281(18) 
C22 0.041(2) 0.089(3) 0.045(2) 0.012(2) 0.0153(18) 0.039(2) 
C23 0.048(2) 0.068(3) 0.0336(19) 0.0099(18) 0.0135(17) 0.037(2) 
C24 0.0378(18) 0.0349(17) 0.0314(17) 0.0107(14) 0.0111(14) 0.0189(14) 
C25 0.0395(18) 0.0296(16) 0.0314(17) 0.0114(13) 0.0090(14) 0.0145(14) 
C26 0.0344(18) 0.045(2) 0.0296(17) 0.0104(15) 0.0082(14) 0.0113(15) 
C27 0.034(2) 0.100(4) 0.035(2) 0.006(2) 0.0052(17) 0.013(2) 
C28 0.033(2) 0.168(6) 0.044(2) 0.006(3) 0.0094(19) 0.033(3) 
C29 0.038(2) 0.116(4) 0.036(2) 0.002(2) 0.0089(17) 0.032(2) 
C30A 0.028(5) 0.039(3) 0.029(3) 0.010(2) 0.016(2) 0.012(3) 
C31A 0.038(4) 0.051(4) 0.0344(18) 0.0113(19) 0.0104(17) 0.018(3) 
C33A 0.0623(18) 0.080(2) 0.030(4) 0.011(2) 0.004(3) 0.0396(14) 
S1A 0.112(2) 0.092(2) 0.0477(11) -0.0164(12) -0.0122(12) 0.0647(19) 
C32A 0.081(6) 0.064(4) 0.026(5) 0.003(4) 0.011(4) 0.047(4) 
C30B 0.028(5) 0.039(3) 0.029(3) 0.010(2) 0.016(2) 0.012(3) 
C32B 0.081(6) 0.064(4) 0.026(5) 0.003(4) 0.011(4) 0.047(4) 
C33B 0.112(2) 0.092(2) 0.0477(11) -0.0164(12) -0.0122(12) 0.0647(19) 
S1B 0.0623(18) 0.080(2) 0.030(4) 0.011(2) 0.004(3) 0.0396(14) 
C31B 0.038(4) 0.051(4) 0.0344(18) 0.0113(19) 0.0104(17) 0.018(3) 
C2A 0.107(12) 0.35(3) 0.100(15) -0.108(18) -0.018(10) 0.062(16) 
Cl4A 0.271(11) 0.138(5) 0.121(5) 0.029(4) 0.057(5) 0.128(6) 
Cl5A 0.103(4) 0.145(5) 0.175(6) -0.039(5) 0.011(4) 0.020(4) 
Cl6A 0.294(16) 0.146(7) 0.130(7) -0.035(6) -0.036(8) 0.049(8) 
C2B 0.107(12) 0.35(3) 0.100(15) -0.108(18) -0.018(10) 0.062(16) 
Cl4B 0.099(7) 0.227(16) 0.073(5) 0.033(8) -0.022(5) 0.087(9) 
Cl5B 0.193(16) 0.30(3) 0.107(9) 0.098(14) -0.016(10) 0.026(17) 
Cl6B 0.25(2) 0.28(3) 0.47(5) -0.13(3) 0.27(3) -0.13(2) 
C2C 0.107(12) 0.35(3) 0.100(15) -0.108(18) -0.018(10) 0.062(16) 
Cl6C 0.187(14) 0.238(19) 0.078(7) 0.055(10) 0.001(7) -0.016(12) 
Cl4C 0.119(9) 0.45(3) 0.154(12) 0.173(17) 0.068(9) 0.090(15) 
Cl5C 0.130(16) 0.78(8) 0.41(5) -0.18(5) 0.16(2) -0.09(3) 
 
_geom_special_details 
; 
 All esds (except the esd in the dihedral angle between two l.s. planes) 
 are estimated using the full covariance matrix.  The cell esds are taken 
 into account individually in the estimation of esds in distances, angles 
 and torsion angles; correlations between esds in cell parameters are only 
 used when they are defined by crystal symmetry.  An approximate (isotropic) 
 treatment of cell esds is used for estimating esds involving l.s. planes. 
; 
 
loop_ 
 _geom_bond_atom_site_label_1 
 _geom_bond_atom_site_label_2 
 _geom_bond_distance 
 _geom_bond_site_symmetry_2 
 _geom_bond_publ_flag 
Ru1 N1 2.037(3) . ? 
Ru1 N4 2.048(3) . ? 
Ru1 N3 2.055(3) . ? 
Ru1 N2 2.061(3) . ? 
Ru1 N5 2.066(3) . ? 
Ru1 N6 2.066(3) . ? 
C1A Cl3A 1.65(2) . ? 
C1A Cl1A 1.753(18) . ? 
C1A Cl2A 1.87(4) . ? 
C1B Cl1B 1.62(3) . ? 
C1B Cl2B 1.75(4) . ? 
C1B Cl3B 2.07(4) . ? 
P1 F1 1.563(3) . ? 
P1 F5 1.567(3) . ? 
P1 F4 1.574(3) . ? 
P1 F6 1.577(4) . ? 
P1 F2 1.587(3) . ? 
P1 F3 1.606(3) . ? 
N1 C1 1.344(5) . ? 
N1 C5 1.371(5) . ? 
N2 C10 1.346(5) . ? 
N2 C6 1.362(5) . ? 
N3 C11 1.343(5) . ? 
N3 C15 1.358(5) . ? 
N4 C20 1.335(5) . ? 
N4 C16 1.368(5) . ? 
N5 C21 1.354(5) . ? 
N5 C24 1.397(4) . ? 
N6 C29 1.342(5) . ? 
N6 C26 1.413(4) . ? 
C1 C2 1.377(5) . ? 
C2 C3 1.378(6) . ? 
C3 C4 1.380(6) . ? 
C4 C5 1.393(5) . ? 
C5 C6 1.474(5) . ? 
C6 C7 1.382(5) . ? 
C7 C8 1.383(7) . ? 
C8 C9 1.373(7) . ? 
C9 C10 1.384(5) . ? 
C11 C12 1.382(6) . ? 
C12 C13 1.368(8) . ? 
C13 C14 1.365(7) . ? 
C14 C15 1.405(6) . ? 
C15 C16 1.474(6) . ? 
C16 C17 1.390(6) . ? 
C17 C18 1.353(8) . ? 
C18 C19 1.406(8) . ? 
C19 C20 1.374(6) . ? 
C21 C22 1.404(5) . ? 
C22 C23 1.359(6) . ? 
C23 C24 1.420(5) . ? 
C24 C25 1.411(5) . ? 
C25 C26 1.386(5) . ? 
C25 C30A 1.458(9) . ? 
C25 C30B 1.590(19) . ? 
C26 C27 1.426(5) . ? 
C27 C28 1.350(6) . ? 
C28 C29 1.406(6) . ? 
C30A C32A 1.364(14) . ? 
C30A C31A 1.416(15) . ? 
C31A C33A 1.409(17) . ? 
C33A S1A 1.664(14) . ? 
S1A C32A 1.688(9) . ? 
C30B C31B 1.37(3) . ? 
C30B C32B 1.41(3) . ? 
C32B C33B 1.44(2) . ? 
C33B S1B 1.672(19) . ? 
S1B C31B 1.67(2) . ? 
C2A Cl6A 1.68(2) . ? 
C2A Cl4A 1.840(15) . ? 
C2A Cl5A 1.88(3) . ? 
C2B Cl6B 1.67(2) . ? 
C2B Cl4B 1.771(19) . ? 
C2B Cl5B 1.87(4) . ? 
C2C Cl5C 1.68(3) . ? 
C2C Cl6C 1.81(2) . ? 
C2C Cl4C 1.89(4) . ? 
 
loop_ 
 _geom_angle_atom_site_label_1 
 _geom_angle_atom_site_label_2 
 _geom_angle_atom_site_label_3 
 _geom_angle 
 _geom_angle_site_symmetry_1 
 _geom_angle_site_symmetry_3 
 _geom_angle_publ_flag 
N1 Ru1 N4 173.86(12) . . ? 
N1 Ru1 N3 95.46(12) . . ? 
N4 Ru1 N3 79.04(12) . . ? 
N1 Ru1 N2 79.38(11) . . ? 
N4 Ru1 N2 97.53(11) . . ? 
N3 Ru1 N2 87.61(11) . . ? 
N1 Ru1 N5 96.48(11) . . ? 
N4 Ru1 N5 86.56(11) . . ? 
N3 Ru1 N5 92.41(11) . . ? 
N2 Ru1 N5 175.84(11) . . ? 
N1 Ru1 N6 86.89(12) . . ? 
N4 Ru1 N6 98.56(13) . . ? 
N3 Ru1 N6 177.46(12) . . ? 
N2 Ru1 N6 91.90(11) . . ? 
N5 Ru1 N6 88.27(11) . . ? 
Cl3A C1A Cl1A 109.2(13) . . ? 
Cl3A C1A Cl2A 109.7(15) . . ? 
Cl1A C1A Cl2A 91.3(13) . . ? 
Cl1B C1B Cl2B 143(3) . . ? 
Cl1B C1B Cl3B 108(2) . . ? 
Cl2B C1B Cl3B 96.7(14) . . ? 
F1 P1 F5 91.6(2) . . ? 
F1 P1 F4 176.1(2) . . ? 
F5 P1 F4 92.3(2) . . ? 
F1 P1 F6 91.4(2) . . ? 
F5 P1 F6 90.3(2) . . ? 
F4 P1 F6 88.2(2) . . ? 
F1 P1 F2 88.5(2) . . ? 
F5 P1 F2 89.4(2) . . ? 
F4 P1 F2 92.0(2) . . ? 
F6 P1 F2 179.7(2) . . ? 
F1 P1 F3 89.28(18) . . ? 
F5 P1 F3 178.6(2) . . ? 
F4 P1 F3 86.9(2) . . ? 
F6 P1 F3 90.75(18) . . ? 
F2 P1 F3 89.57(17) . . ? 
C1 N1 C5 118.2(3) . . ? 
C1 N1 Ru1 126.0(2) . . ? 
C5 N1 Ru1 115.8(2) . . ? 
C10 N2 C6 118.9(3) . . ? 
C10 N2 Ru1 125.7(2) . . ? 
C6 N2 Ru1 115.4(2) . . ? 
C11 N3 C15 118.2(3) . . ? 
C11 N3 Ru1 125.8(3) . . ? 
C15 N3 Ru1 116.1(2) . . ? 
C20 N4 C16 118.1(3) . . ? 
C20 N4 Ru1 126.1(3) . . ? 
C16 N4 Ru1 115.5(3) . . ? 
C21 N5 C24 106.3(3) . . ? 
C21 N5 Ru1 125.7(2) . . ? 
C24 N5 Ru1 127.9(2) . . ? 
C29 N6 C26 105.5(3) . . ? 
C29 N6 Ru1 126.0(3) . . ? 
C26 N6 Ru1 127.6(2) . . ? 
N1 C1 C2 123.0(4) . . ? 
C1 C2 C3 119.1(4) . . ? 
C2 C3 C4 119.0(4) . . ? 
C3 C4 C5 119.9(4) . . ? 
N1 C5 C4 120.7(4) . . ? 
N1 C5 C6 114.8(3) . . ? 
C4 C5 C6 124.4(3) . . ? 
N2 C6 C7 120.8(4) . . ? 
N2 C6 C5 114.6(3) . . ? 
C7 C6 C5 124.5(4) . . ? 
C6 C7 C8 119.6(4) . . ? 
C9 C8 C7 119.5(4) . . ? 
C8 C9 C10 118.8(4) . . ? 
N2 C10 C9 122.3(4) . . ? 
N3 C11 C12 123.1(4) . . ? 
C13 C12 C11 118.8(5) . . ? 
C14 C13 C12 119.6(4) . . ? 
C13 C14 C15 119.9(5) . . ? 
N3 C15 C14 120.5(4) . . ? 
N3 C15 C16 114.3(3) . . ? 
C14 C15 C16 125.1(4) . . ? 
N4 C16 C17 121.5(4) . . ? 
N4 C16 C15 114.9(3) . . ? 
C17 C16 C15 123.6(4) . . ? 
C18 C17 C16 119.0(5) . . ? 
C17 C18 C19 120.4(5) . . ? 
C20 C19 C18 117.4(5) . . ? 
N4 C20 C19 123.5(4) . . ? 
N5 C21 C22 110.6(3) . . ? 
C23 C22 C21 107.3(3) . . ? 
C22 C23 C24 107.4(3) . . ? 
N5 C24 C25 124.7(3) . . ? 
N5 C24 C23 108.4(3) . . ? 
C25 C24 C23 126.8(3) . . ? 
C26 C25 C24 126.3(3) . . ? 
C26 C25 C30A 114.8(5) . . ? 
C24 C25 C30A 118.8(5) . . ? 
C26 C25 C30B 124.0(11) . . ? 
C24 C25 C30B 109.4(11) . . ? 
C30A C25 C30B 11.4(14) . . ? 
C25 C26 N6 124.5(3) . . ? 
C25 C26 C27 127.3(3) . . ? 
N6 C26 C27 108.2(3) . . ? 
C28 C27 C26 107.5(4) . . ? 
C27 C28 C29 107.2(4) . . ? 
N6 C29 C28 111.6(4) . . ? 
C32A C30A C31A 111.5(7) . . ? 
C32A C30A C25 121.6(11) . . ? 
C31A C30A C25 126.4(11) . . ? 
C33A C31A C30A 110.5(11) . . ? 
C31A C33A S1A 112.7(10) . . ? 
C33A S1A C32A 91.9(6) . . ? 
C30A C32A S1A 113.3(7) . . ? 
C31B C30B C32B 110.1(15) . . ? 
C31B C30B C25 121(2) . . ? 
C32B C30B C25 128(2) . . ? 
C30B C32B C33B 111.9(18) . . ? 
C32B C33B S1B 108.1(17) . . ? 
C33B S1B C31B 93.7(13) . . ? 
C30B C31B S1B 113.3(18) . . ? 
Cl6A C2A Cl4A 119.3(14) . . ? 
Cl6A C2A Cl5A 103.4(12) . . ? 
Cl4A C2A Cl5A 93.7(13) . . ? 
Cl6B C2B Cl4B 95.6(16) . . ? 
Cl6B C2B Cl5B 104.8(18) . . ? 
Cl4B C2B Cl5B 102.2(16) . . ? 
Cl5C C2C Cl6C 93.3(15) . . ? 
Cl5C C2C Cl4C 103.6(19) . . ? 
Cl6C C2C Cl4C 97.9(15) . . ? 
 
_diffrn_measured_fraction_theta_max    0.996 
_diffrn_reflns_theta_full              25.00 
_diffrn_measured_fraction_theta_full   0.996 
_refine_diff_density_max    0.826 
_refine_diff_density_min   -0.476 
_refine_diff_density_rms    0.070 
